# Supplementary material for: Carbohydrate Recognition Specificity of Trans-sialidase Lectin Domain from Trypanosoma congolense
Source: PLOS journal article supplement (doi:10.1371/journal.pntd.0004120), 2015-10-16
Supplement: S6 (10.1371/journal.pntd.0004120.s006) [file journal.pntd.0004120.s006]

**Table S2:** *Sequence similarities between TconTS-LDs*

|                   | <b>TconTS1-LD</b> | <b>TconTS2-LD</b> | <b>TconTS3-LD</b> | <b>TconTS4-LD</b> |
|-------------------|-------------------|-------------------|-------------------|-------------------|
| <b>TconTS-LD1</b> | -                 | 42.3% (54.6%)     | 41.0% (57.7%)     | 40.7% (51.8%)     |
| <b>TconTS-LD2</b> | 42.3% (54.6%)     | -                 | 39.9% (54.4%)     | 37.4% (55.1%)     |
| <b>TconTS-LD3</b> | 41.0% (57.7%)     | 39.9% (54.4%)     | -                 | 45.4% (61.7%)     |
| <b>TconTS-LD4</b> | 40.7% (51.8%)     | 37.4% (55.1%)     | 45.4% (61.7%)     | -                 |

The amino acid sequences of TconTS-LD were pairwise aligned using the Blosum62 matrix with a gap opening penalty of 12 and a gap extension penalty of 5. Shown are the percent of positions with identical or similar (giving a positive value in the Blosum62 matrix; in brackets) amino acids.
